# Supplementary material for: Iron piano-stool complexes containing NHC ligands outfitted with pendent arms: synthesis, characterization, and screening for catalytic transfer hydrogenation
Source: Royal Society of Chemistry journal article supplement (doi:10.1039/c6ra20764b), 2016-01-01
Supplement: c6ra20764b1.pdf [file c6ra20764b1.pdf]

*Supporting Information for*

**Iron piano-stool complexes containing NHC ligands outfitted with pendent arms: synthesis, characterization, and screening for catalytic transfer hydrogenation**

Parthapratim Das,<sup>a</sup> Thomas Elder,<sup>b</sup> William W. Brennessel,<sup>c</sup> and Stephen C. Chmely<sup>a\*</sup>

<sup>a</sup> Center for Renewable Carbon, University of Tennessee, Knoxville, Tennessee 37996, USA.

<sup>b</sup> USDA-Forest Service, Southern Research Station, Auburn, Alabama 36849, USA.

<sup>c</sup> X-ray Crystallographic Facility, Department of Chemistry, University of Rochester, Rochester, New York 14627, USA.

**Table of Contents**

|                                                                                       |       |
|---------------------------------------------------------------------------------------|-------|
| Experimental results of in-situ transfer hydrogenation involving FpI and 1 or 2 ..... | S2    |
| UV-assisted in-situ transfer hydrogenation involving FpI and 1 or 2 .....             | S2    |
| NMR spectra of complexes <b>1-4</b> .....                                             | S3-S6 |
| Optimized geometry coordinates (DFT).....                                             | S7    |

**Table S1:** Catalytic transfer hydrogenation of acetophenone catalysed by FpI and **1** and **2**

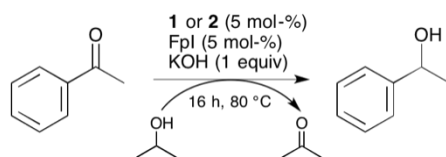

| Imidazolium salt  | %Conversion | %Selectivity | %Yield |
|-------------------|-------------|--------------|--------|
| None <sup>a</sup> | 56          | 79           | 44     |
| <b>1</b>          | 56          | 70           | 39     |
| <b>2</b>          | >99         | >99          | >99    |

<sup>a</sup>Neither Fe nor imidazolium salt was present in this blank reaction.

**Table S2:** UV-assisted CTH of acetophenone catalysed by FpI and **1** and **2**

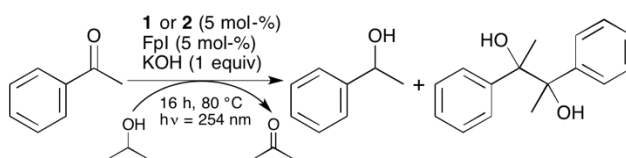

| Imidazolium salt | %Conversion | %Selectivity <sup>a</sup> | %Yield <sup>a</sup> |
|------------------|-------------|---------------------------|---------------------|
| <b>1</b>         | 100         | 40                        | 40                  |
| <b>2</b>         | 77          | 29                        | 22                  |

<sup>a</sup>Reported for 1-phenylethanol.

$^1\text{H}$  NMR spectrum of **1**.

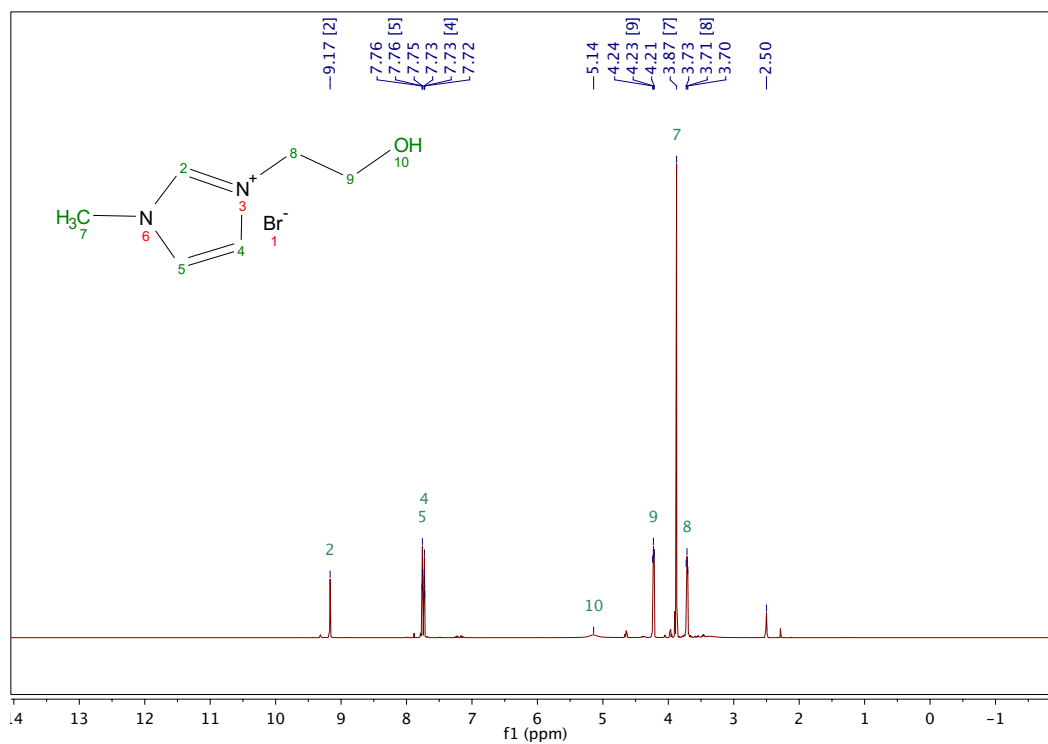

$^{13}\text{C}$  NMR spectrum of **1**.

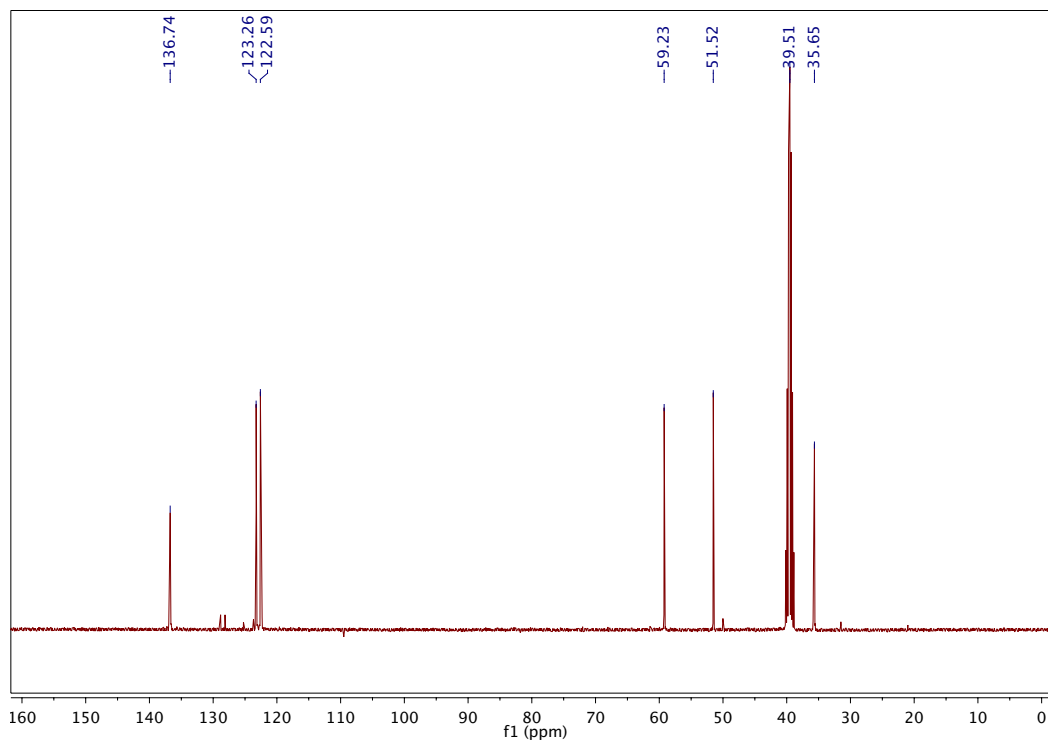

$^1\text{H}$  NMR spectrum of **2**.

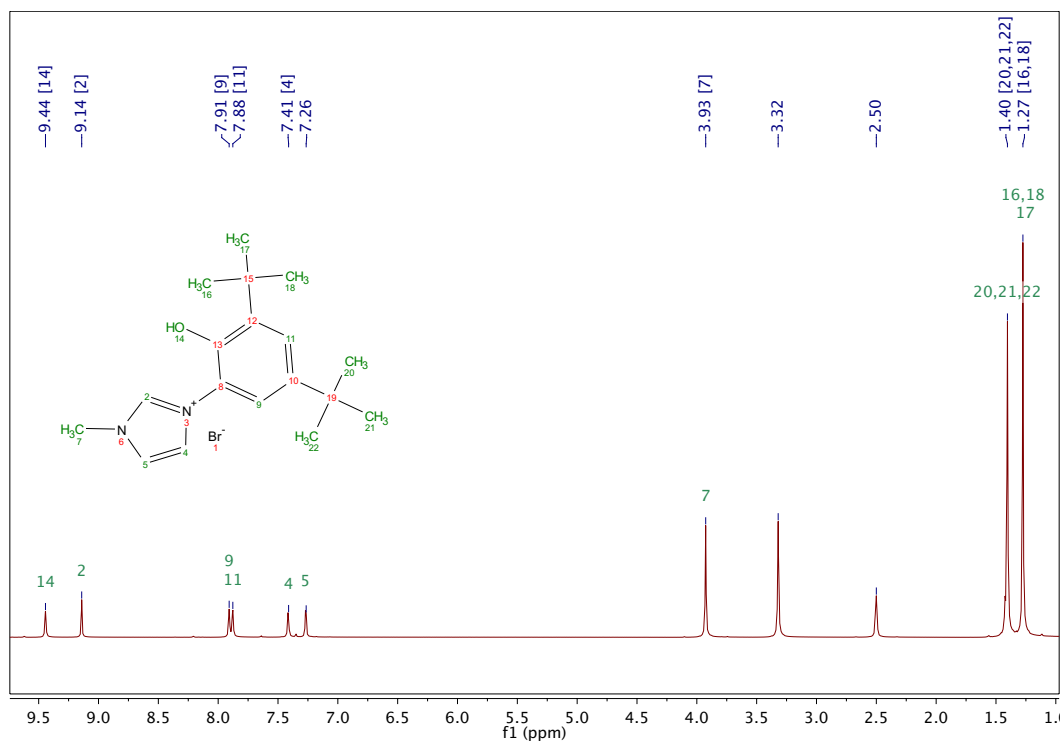

$^{13}\text{C}$  NMR spectrum of **2**.

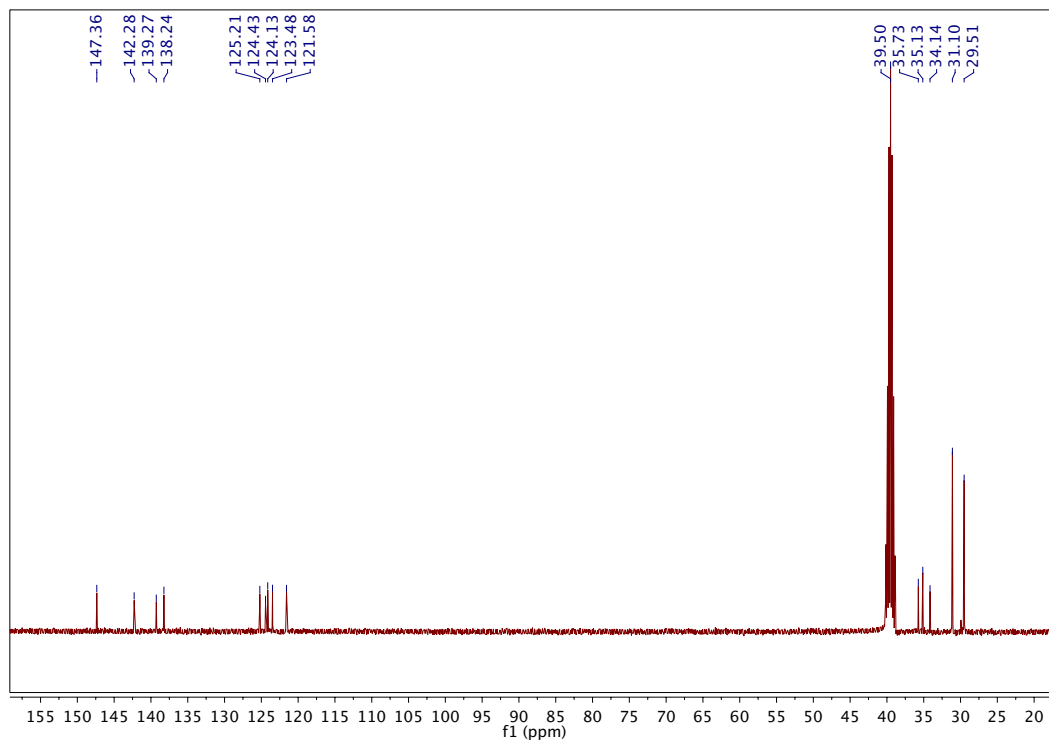

$^1\text{H}$  NMR spectrum of a single crystal of **3**.

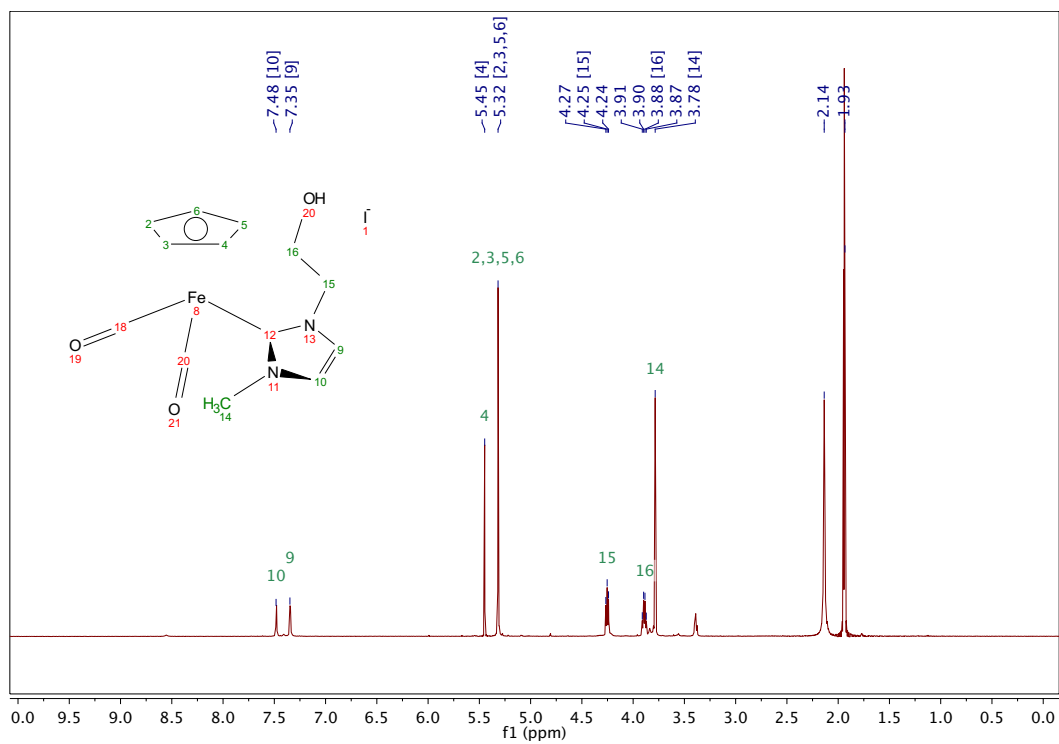

$^{13}\text{C}$  NMR spectrum of a single crystal of **3**.

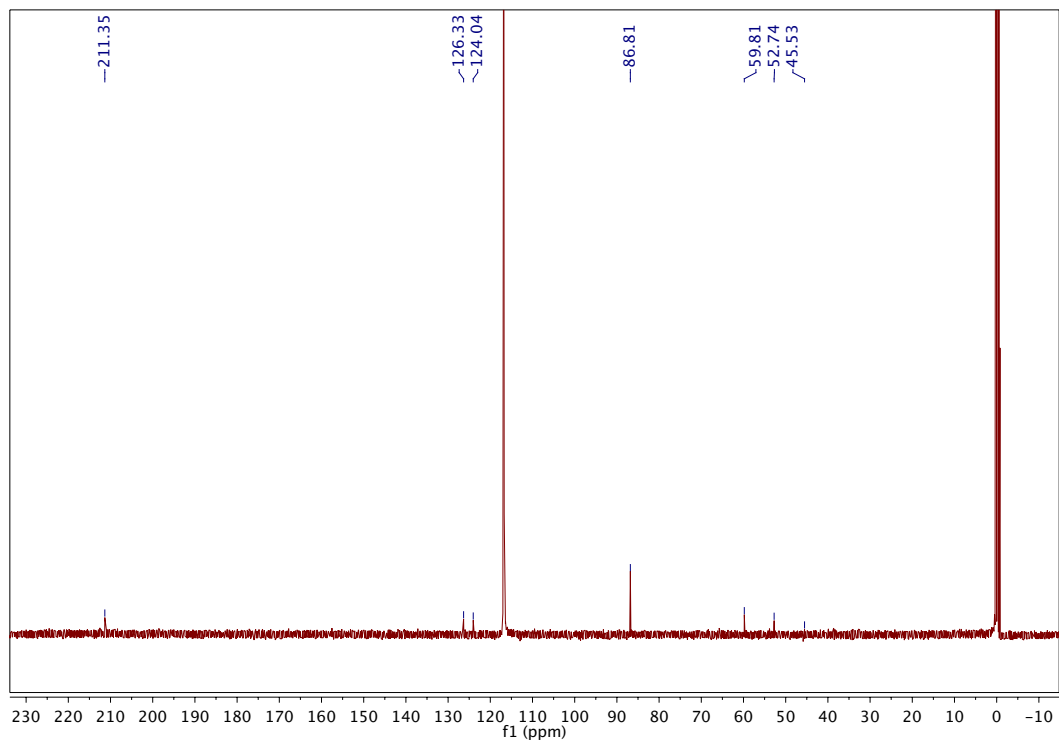

$^1\text{H}$  NMR spectrum of a single crystal of **4**.

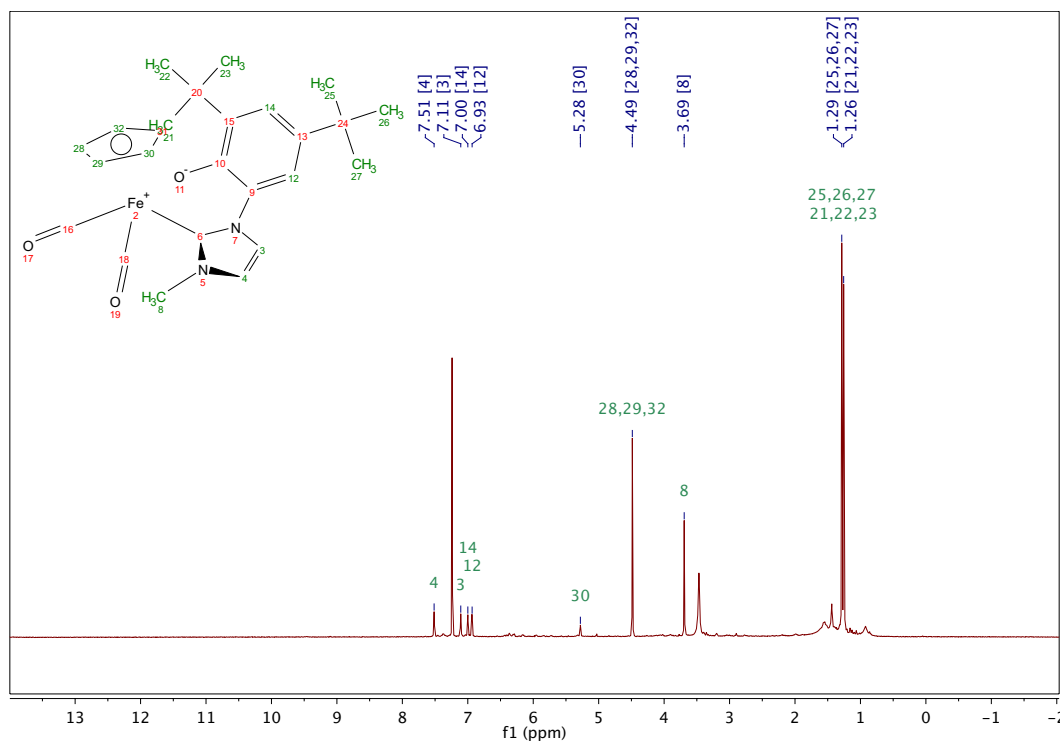

$^{13}\text{C}$  NMR spectrum of a single crystal of **4**.

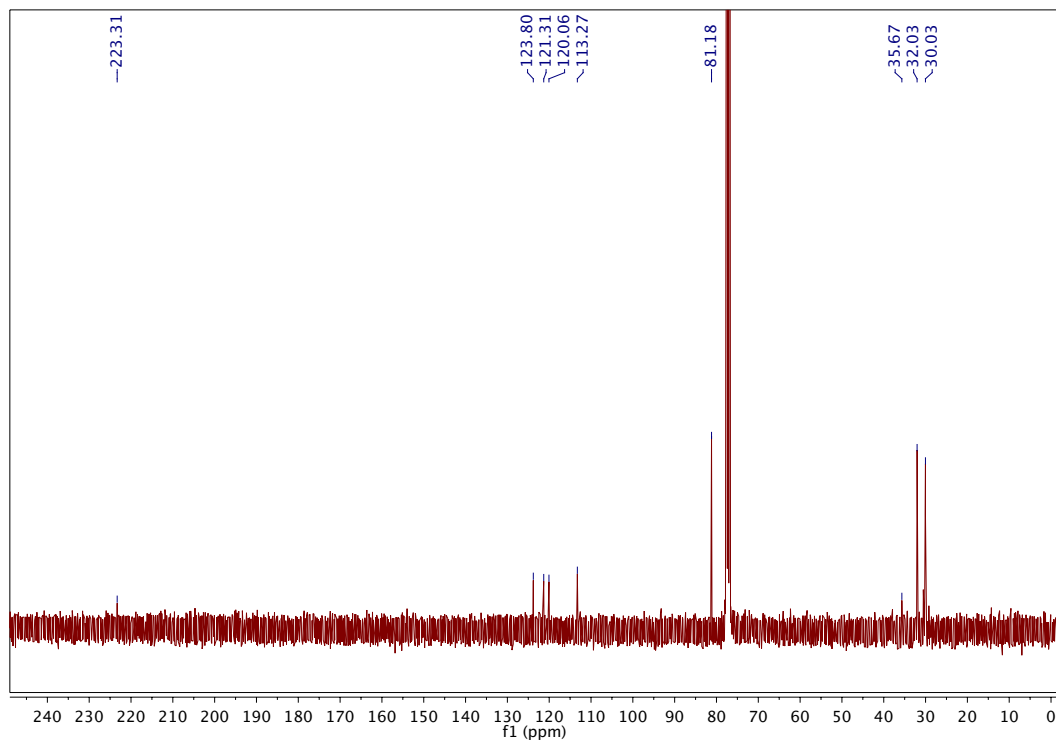

**Table S1** Optimized coordinates of **3**.

| <b>Symbol</b> | <b>X</b>   | <b>Y</b>   | <b>Z</b>   |
|---------------|------------|------------|------------|
| N             | 0.8976100  | 2.0603918  | -0.4364358 |
| N             | 1.9154311  | 0.4237445  | 0.4910252  |
| C             | 0.6874224  | 0.8246259  | 0.0783092  |
| C             | 2.8677173  | 1.3964607  | 0.2477761  |
| C             | 2.2835988  | -0.8934528 | 1.0090034  |
| H             | 2.7875862  | -0.7678828 | 1.9695713  |
| C             | 2.2255152  | 2.4285658  | -0.3354137 |
| C             | -0.1078310 | 2.9301126  | -1.0390835 |
| Fe            | -1.0602685 | -0.1962449 | 0.1490153  |
| H             | 3.9041755  | 1.2711764  | 0.5113228  |
| C             | 3.1757514  | -1.6492714 | 0.0399598  |
| H             | 1.3716031  | -1.4646774 | 1.1594797  |
| H             | 2.5868576  | 3.3812034  | -0.6836483 |
| H             | -0.8561400 | 2.3221271  | -1.5417865 |
| H             | 0.3807208  | 3.5632452  | -1.7774011 |
| H             | -0.5788204 | 3.5607353  | -0.2844555 |
| C             | -0.7969452 | -0.6525719 | 1.9606694  |
| C             | -2.0377108 | -2.0885261 | -0.3095449 |
| C             | -0.6816729 | -2.1139303 | -0.7636022 |
| C             | -0.5411716 | -1.1085253 | -1.7507237 |
| C             | -1.7750917 | -0.4274800 | -1.8761223 |
| C             | -2.0808292 | 1.3216551  | 0.6158967  |
| C             | -2.7079958 | -1.0528897 | -0.9869484 |
| O             | 2.4248949  | -1.8629166 | -1.1391249 |
| H             | 4.0862258  | -1.0771324 | -0.1692267 |
| H             | 3.4650018  | -2.5948180 | 0.5106301  |
| O             | -0.6408109 | -0.9403887 | 3.0346834  |
| H             | -2.4726601 | -2.7397692 | 0.4343794  |
| H             | 0.0904216  | -2.8060158 | -0.4672730 |
| H             | 0.3812537  | -0.8700833 | -2.2573802 |
| H             | -1.9978468 | 0.3720989  | -2.5661144 |
| O             | -2.7294830 | 2.1992749  | 0.8803996  |
| H             | -3.7438333 | -0.7767137 | -0.8551113 |
| H             | 2.9698168  | -2.3164877 | -1.7882397 |

**Table S2** Optimized coordinates of **3z**.

| <b>Symbol</b> | <b>X</b>   | <b>Y</b>   | <b>Z</b>   |
|---------------|------------|------------|------------|
| N             | 1.1579631  | 1.8839324  | -0.4271318 |
| N             | 1.9593825  | 0.1767330  | 0.5968463  |
| C             | 0.8061830  | 0.6867392  | 0.1157469  |
| C             | 3.0161844  | 1.0235161  | 0.3373235  |
| C             | 2.2177332  | -1.2165526 | 0.9717509  |
| H             | 2.8945445  | -1.2166817 | 1.8321879  |
| C             | 2.5161526  | 2.1027562  | -0.2986301 |
| C             | 0.2766322  | 2.8271972  | -1.0938528 |
| Fe            | -1.0488933 | -0.0996891 | 0.1667951  |
| H             | 4.0262255  | 0.7609468  | 0.5997811  |
| C             | 2.7852594  | -1.9680647 | -0.2787372 |
| H             | 1.2715584  | -1.6750148 | 1.2491816  |
| H             | 2.9928530  | 2.9899435  | -0.6781174 |
| H             | -0.5349469 | 2.2855218  | -1.5735377 |
| H             | 0.8454321  | 3.3505561  | -1.8612746 |
| H             | -0.1291267 | 3.5573808  | -0.3909620 |
| C             | -0.8024259 | -0.6348148 | 1.9351541  |
| C             | -2.2355273 | -1.8516261 | -0.3176122 |
| C             | -0.9003967 | -2.0208750 | -0.7986126 |
| C             | -0.6523411 | -1.0150011 | -1.7628233 |
| C             | -1.8025021 | -0.1925464 | -1.8490294 |
| C             | -1.8103704 | 1.5105010  | 0.6713471  |
| C             | -2.7920000 | -0.7228244 | -0.9544939 |
| O             | 1.9689077  | -1.8571052 | -1.3210492 |
| H             | 3.8148663  | -1.5479477 | -0.4282161 |
| H             | 2.9592179  | -3.0070450 | 0.0993207  |
| O             | -0.6819597 | -0.9621951 | 3.0057829  |
| H             | -2.7308552 | -2.4589454 | 0.4260872  |
| H             | -0.1623701 | -2.7630419 | -0.5357517 |
| H             | 0.3233072  | -0.9050587 | -2.2209749 |
| H             | -1.9443898 | 0.6486290  | -2.5107973 |
| O             | -2.3030175 | 2.4822519  | 0.9646573  |
| H             | -3.7834390 | -0.3260362 | -0.7919143 |



**Table S3** Optimized coordinates of **4**.

| <b>Symbol</b> | <b>X</b>   | <b>Y</b>   | <b>Z</b>   |
|---------------|------------|------------|------------|
| O             | 0.4488704  | -0.5312738 | -2.2044593 |
| C             | -0.4572541 | -0.3741992 | -1.5567289 |
| Fe            | -2.1919178 | 0.0419876  | -0.8267167 |
| C             | -2.9382937 | -1.5634066 | -1.3788496 |
| C             | -3.8003922 | 1.4092488  | -0.3364049 |
| C             | -3.7443122 | 1.2799231  | -1.7516259 |
| C             | -2.4718060 | 1.7118789  | -2.1864302 |
| C             | -1.8341225 | -0.7531023 | 0.9771856  |
| C             | -2.5622635 | 1.9683356  | 0.0988847  |
| C             | -1.7443767 | 2.1478606  | -1.0311484 |
| O             | -3.4116867 | -2.5423151 | -1.6782073 |
| H             | -4.6541965 | 1.1849422  | 0.2830723  |
| H             | -4.5244607 | 0.8785507  | -2.3824533 |
| H             | -2.1209514 | 1.7277838  | -3.2070623 |
| N             | -2.7167029 | -1.1833149 | 1.9142971  |
| N             | -0.6271867 | -0.8738976 | 1.5656355  |
| H             | -2.2280405 | 2.1423635  | 1.1108166  |
| H             | -0.7276679 | 2.5074334  | -1.0004741 |
| C             | -4.1634163 | -1.2230916 | 1.7882397  |
| C             | -2.0638564 | -1.5396095 | 3.0818876  |
| C             | -0.7470057 | -1.3360149 | 2.8590690  |
| C             | 0.6245085  | -0.4859678 | 0.9780270  |
| H             | -4.5382140 | -2.1375464 | 2.2478576  |
| H             | -4.4379302 | -1.2133278 | 0.7371905  |
| H             | -4.6127963 | -0.3593992 | 2.2820658  |
| H             | -2.5936967 | -1.8971676 | 3.9480840  |
| H             | 0.1162661  | -1.4667666 | 3.4878845  |
| C             | 1.4909373  | -1.4826060 | 0.5499591  |
| C             | 0.9092345  | 0.9224036  | 0.9572615  |
| H             | 1.1693436  | -2.5174137 | 0.6417100  |
| C             | 2.7086821  | -1.1540583 | -0.0245575 |
| C             | 2.2043508  | 1.2409492  | 0.3849722  |
| O             | 0.0825427  | 1.7663900  | 1.4026891  |
| C             | 3.6349947  | -2.2525419 | -0.5526817 |
| C             | 3.0180931  | 0.2200091  | -0.0837883 |
| C             | 2.6686954  | 2.7010360  | 0.3838281  |
| C             | 2.9287918  | -3.0266721 | -1.6793054 |
| C             | 3.9873839  | -3.2289607 | 0.5824135  |
| C             | 4.9428838  | -1.6851956 | -1.1141081 |
| H             | 3.9708471  | 0.4974462  | -0.5130643 |
| C             | 2.7626127  | 3.1948108  | 1.8397122  |
| C             | 1.6727055  | 3.5896135  | -0.3821046 |
| C             | 4.0452600  | 2.8782861  | -0.2670694 |

|   |           |            |            |
|---|-----------|------------|------------|
| H | 2.0007684 | -3.4824472 | -1.3244714 |
| H | 2.6807590 | -2.3559310 | -2.5056283 |
| H | 3.5728788 | -3.8254446 | -2.0607443 |
| H | 4.4943040 | -2.7028284 | 1.3950869  |
| H | 4.6478786 | -4.0211343 | 0.2159763  |
| H | 3.0926267 | -3.7018097 | 0.9941124  |
| H | 5.5710352 | -2.5039260 | -1.4750445 |
| H | 4.7593376 | -1.0088912 | -1.9529641 |
| H | 5.5046282 | -1.1423254 | -0.3495480 |
| H | 1.7983438 | 3.0940777  | 2.3379792  |
| H | 3.5089071 | 2.6134853  | 2.3884463  |
| H | 3.0658228 | 4.2468115  | 1.8599051  |
| H | 1.5475662 | 3.2273663  | -1.4083888 |
| H | 0.7089885 | 3.5963706  | 0.1254589  |
| H | 2.0503179 | 4.6157904  | -0.4317303 |
| H | 4.3218081 | 3.9353589  | -0.2351330 |
| H | 4.0421231 | 2.5643935  | -1.3151298 |
| H | 4.8204756 | 2.3170243  | 0.2612887  |
